# Supplementary material for: Genome-wide identification of Diacylglycerol Acyltransferases (DGAT) family genes influencing Milk production in Buffalo
Source: PubMed Central journal article supplement (PMC7059399; doi:10.1186/s12863-020-0832-y), 2020-03-06

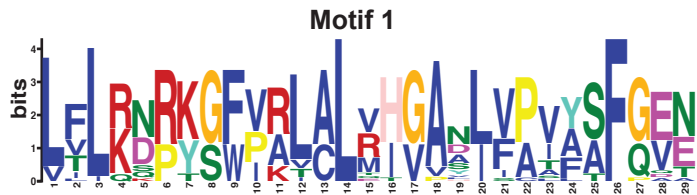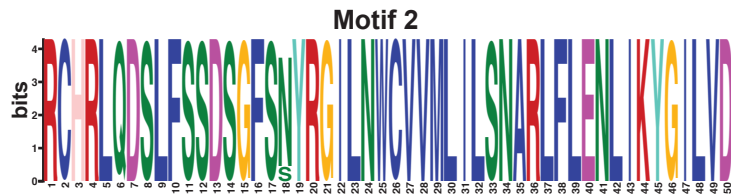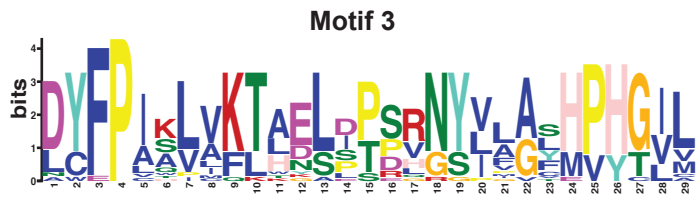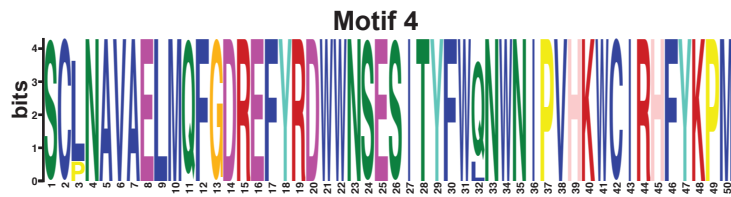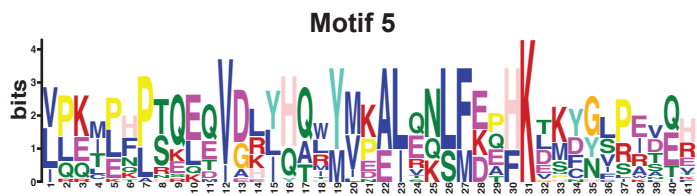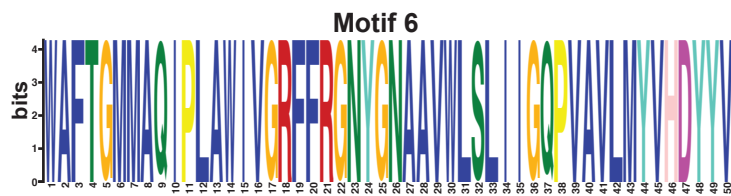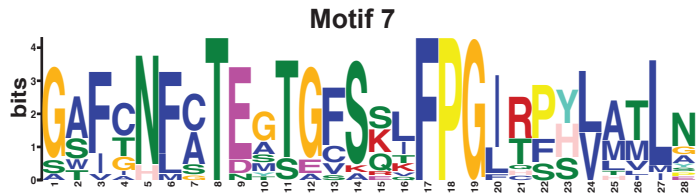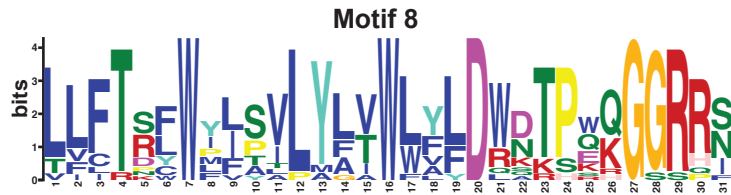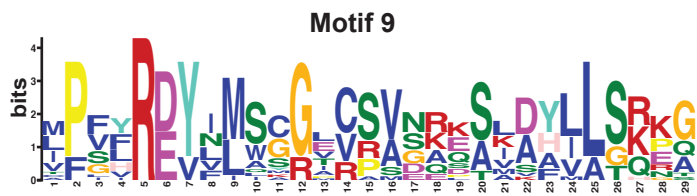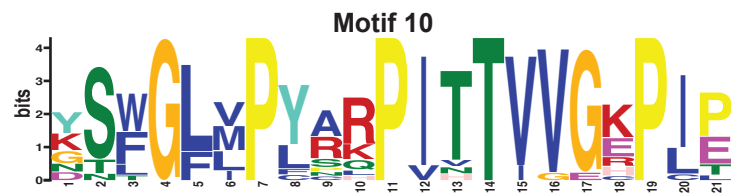

Supplement: 12863_2020_832_MOESM4_ESM.pdf [file 12863_2020_832_MOESM4_ESM.pdf]
